# Supplementary material for: Association of Dietary Patterns in Midlife and Cognitive Function in Later Life in US Adults Without Dementia
Source: PubMed Central journal article supplement (PMC6902753; doi:10.1001/jamanetworkopen.2019.16641), 2019-12-04
Supplement: jamanetwopen-2-e1916641-s001.pdf [file jamanetwopen-2-e1916641-s001.pdf]

## Supplementary Online Content

Dearborn-Tomazos JL, Wu A, Steffen LM, et al. Association of dietary patterns in midlife and cognitive function in later life in US adults without dementia. *JAMA Netw Open*. 2019;2(12):e1916641. doi:10.1001/jamanetworkopen.2019.16641

**eTable 1.** Factor Loadings for Western and Prudent Diet Pattern Components According to Principal Components Analysis

**eTable 2.** Estimated 20-Year Change in Digit Symbol Substitution (DSS) by Tertile of Diet Pattern

**eTable 3.** Estimated 20-Year Change in Delayed Word Recall (DWR) by Tertile of Diet Pattern

**eTable 4.** 21-Year Change in Word Fluency Test (WF) by Tertile of Diet Pattern

**eTable 5.** Estimated 20-Year Change in Cognitive Function by Tertile of Diet Pattern Using Non-imputed Data

**eTable 6.** Participant Characteristics by Tertile of Prudent Diet Score

This supplementary material has been provided by the authors to give readers additional information about their work.

**eTable 1: Factor loadings for Western and Prudent Diet Pattern Components According to Principal Components Analysis**

| Food category  | Western | Prudent |
|----------------|---------|---------|
| Dairy          | 0.023   | 0.334   |
| Fat            | 0.189   | 0.178   |
| Fruit          | -0.100  | 0.447   |
| Vegetable      | 0.057   | 0.450   |
| Chicken        | -0.036  | 0.333   |
| Meat           | 0.459   | 0.054   |
| Fish           | -0.035  | 0.351   |
| Eggs           | 0.314   | 0.038   |
| Sweets         | 0.213   | 0.053   |
| Nuts           | 0.104   | 0.221   |
| French fries   | 0.347   | -0.006  |
| Fried foods    | 0.395   | -0.034  |
| Coffee         | 0.115   | -0.023  |
| Tea            | 0.065   | 0.069   |
| Diet soda      | -0.013  | 0.136   |
| Soda           | 0.258   | -0.149  |
| Juice          | 0.146   | 0.015   |
| Alcohol        | 0.038   | -0.058  |
| Refined grains | 0.439   | 0.027   |
| Whole grains   | -0.079  | 0.338   |

**eTable 2: Estimated 20-year Change in Digit Symbol Substitution (DSS) by Tertile of Diet Pattern**

|                           | Tertile 1              | Tertile 2              | Tertile 3              | p-trend |
|---------------------------|------------------------|------------------------|------------------------|---------|
| <u>Western Diet Score</u> |                        |                        |                        |         |
| N                         | 4553                   | 4541                   | 4494                   |         |
| Change in z-score         | -0.77 (-0.80 to -0.75) | -0.73 (-0.75 to -0.70) | -0.68 (-0.70 to -0.66) | <0.001  |
| Model 1                   | Reference              | 0.01 (-0.02 to 0.04)   | 0.02 (-0.02 to 0.05)   | 0.340   |
| Model 2                   | Reference              | 0.00 (-0.03 to 0.03)   | 0.01 (-0.02 to 0.04)   | 0.635   |
| <u>Prudent Diet Score</u> |                        |                        |                        |         |
| N                         | 4541                   | 4536                   | 4511                   |         |
| Change in z-score         | -0.69 (-0.71 to -0.67) | -0.73 (-0.75 to -0.70) | -0.76 (-0.79 to -0.74) | <0.001  |
| Model 1                   | Reference              | 0.01 (-0.02 to 0.04)   | -0.01 (-0.04 to 0.02)  | 0.639   |
| Model 2                   | Reference              | 0.01 (-0.02 to 0.04)   | 0.00 (-0.03 to 0.03)   | 0.994   |

Model 1: adjusted for age, sex, education, race-center, total calories

Model 2: adjusted for Model 1 and APOEε4 status, drinking history, smoking history, activity level, body mass index, total cholesterol, prevalent CHD, hypertension, diabetes, and stroke.

A linear trend was tested across the dietary tertiles using the median score of each tertile modeled as a continuous variable.

**eTable 3: Estimated 20-year Change in Delayed Word Recall (DWR) by Tertile of Diet Pattern**

|                           | Tertile 1              | Tertile 2              | Tertile 3              | p-trend |
|---------------------------|------------------------|------------------------|------------------------|---------|
| <u>Western Diet Score</u> |                        |                        |                        |         |
| N                         | 4553                   | 4541                   | 4494                   |         |
| Change in z-score         | -1.02 (-1.07 to -0.97) | -1.03 (-1.08 to -0.97) | -1.02 (-1.07 to -0.97) | 0.998   |
| Model 1                   | Reference              | -0.02 (-0.09 to 0.05)  | -0.01 (-0.08 to 0.07)  | 0.853   |
| Model 2                   | Reference              | -0.02 (-0.09 to 0.05)  | -0.01 (-0.09 to 0.06)  | 0.804   |
| <u>Prudent Diet Score</u> |                        |                        |                        |         |
| N                         | 4541                   | 4536                   | 4511                   |         |
| Change in z-score         | -0.98 (-1.03 to -0.93) | -1.05 (-1.10 to -1.00) | -1.03 (-1.08 to -0.98) | 0.268   |
| Model 1                   | Reference              | -0.03 (-0.10 to 0.04)  | -0.01 (-0.08 to 0.06)  | 0.885   |
| Model 2                   | Reference              | -0.03 (-0.10 to 0.04)  | -0.00 (-0.07 to 0.07)  | 0.999   |

Model 1: adjusted for age, sex, education, race-center, total calories

Model 2: adjusted for Model 1 and APOEε4 status, drinking history, smoking history, activity level, body mass index, total cholesterol, prevalent CHD, hypertension, diabetes, and stroke.

A linear trend was tested across the dietary tertiles using the median score of each tertile modeled as a continuous variable.

**eTable 4: 21-year Change in Word Fluency Test (WF) by Tertile of Diet Pattern**

|                           | Tertile 1              | Tertile 2              | Tertile 3              | p-trend |
|---------------------------|------------------------|------------------------|------------------------|---------|
| <u>Western Diet Score</u> |                        |                        |                        |         |
| N                         | 4553                   | 4541                   | 4494                   |         |
| Change in z-score         | -0.20 (-0.22 to -0.17) | -0.20 (-0.23 to -0.17) | -0.17 (-0.20 to -0.14) | 0.219   |
| Model 1                   | Reference              | -0.01 (-0.05 to 0.03)  | 0.01 (-0.03 to 0.06)   | 0.434   |
| Model 2                   | Reference              | -0.01 (-0.05 to 0.03)  | 0.01 (-0.03 to 0.05)   | 0.559   |
| <u>Prudent Diet Score</u> |                        |                        |                        |         |
| N                         | 4541                   | 4536                   | 4511                   |         |
| Change in z-score         | -0.18 (-0.21 to -0.15) | -0.19 (-0.22 to -0.17) | -0.20 (-0.23 to -0.17) | 0.335   |
| Model 1                   | Reference              | -0.00 (-0.04 to 0.04)  | -0.01 (-0.05 to 0.03)  | 0.67    |
| Model 2                   | Reference              | 0.01 (-0.03 to 0.04)   | 0.00 (-0.04 to 0.04)   | 0.985   |

Model 1: adjusted for age, sex, education, race-center, total calories

Model 2: adjusted for Model 1 and APOEε4 status, drinking history, smoking history, activity level, body mass index, total cholesterol, prevalent CHD, hypertension, diabetes, and stroke

A linear trend was tested across the dietary tertiles using the median score of each tertile modeled as a continuous variable.

**eTable 5: Estimated 20-year Change in Cognitive Function by Tertile of Diet Pattern Using Non-Imputed Data**

|                           | Tertile 1              | Tertile 2              | Tertile 3              | p-trend |
|---------------------------|------------------------|------------------------|------------------------|---------|
| <u>Western Diet Score</u> |                        |                        |                        |         |
| N                         | 1998                   | 1929                   | 1788                   |         |
| Change in z-score         | -0.85 (-0.88 to -0.82) | -0.82 (-0.85 to -0.79) | -0.80 (-0.83 to -0.77) | 0.045   |
| Model 1                   | Reference              | 0.01 (-0.04 to 0.05)   | 0.01 (-0.04 to 0.06)   | 0.756   |
| Model 2                   | Reference              | -0.00 (-0.05 to 0.04)  | 0.00 (-0.05 to 0.05)   | 0.797   |
|                           |                        |                        |                        |         |
| <u>Prudent Diet Score</u> |                        |                        |                        |         |
| N                         | 1844                   | 1953                   | 1918                   |         |
| Change in z-score         | -0.79 (-0.82 to -0.76) | -0.83 (-0.86 to -0.80) | -0.85 (-0.88 to -0.82) | 0.014   |
| Model 1                   | Reference              | -0.00 (-0.05 to 0.04)  | -0.01 (-0.05 to 0.04)  | 0.963   |
| Model 2                   | Reference              | -0.01 (-0.05 to 0.04)  | -0.01 (-0.05 to 0.04)  | 0.818   |

Model 1: adjusted for age, sex, education, race-center, total calories

Model 2: adjusted for Model 1 and APOEε4 status, drinking history, smoking history, activity level, body mass index, total cholesterol, prevalent CHD, history of hypertension, diabetes, and stroke

A linear trend was tested across the dietary tertiles using the median score of each tertile modeled as a continuous variable.

**eTable 6: Participant Characteristics by Tertile of Prudent Diet Score**

|                                      |                                | Total        | Tertile 1    | Tertile 2    | Tertile 3    | p-value |
|--------------------------------------|--------------------------------|--------------|--------------|--------------|--------------|---------|
| N                                    |                                | 13588        | 4541         | 4536         | 4511         |         |
| Age (mean, SD)                       |                                | 54.6 (5.7)   | 54.1 (5.7)   | 54.8 (5.7)   | 54.9 (5.7)   | <0.001  |
| Women                                |                                | 7588 (55.8%) | 2316 (51.0%) | 2570 (56.7%) | 2702 (59.9%) | <0.001  |
| Black                                |                                | 3191 (23.5%) | 1316 (29.0%) | 1000 (22.0%) | 875 (19.4%)  | <0.001  |
| Study center                         | Forsyth County NC              | 3537 (26.0%) | 1127 (24.8%) | 1213 (26.7%) | 1197 (26.5%) | <0.001  |
|                                      | Jackson MS                     | 2844 (20.9%) | 1211 (26.7%) | 903 (19.9%)  | 730 (16.2%)  |         |
|                                      | Minneapolis MN                 | 3698 (27.2%) | 1073 (23.6%) | 1263 (27.8%) | 1362 (30.2%) |         |
|                                      | Washington County MD           | 3509 (25.8%) | 1130 (24.9%) | 1157 (25.5%) | 1222 (27.1%) |         |
| Education                            | Below High school              | 2856 (21.0%) | 1144 (25.2%) | 934 (20.6%)  | 778 (17.2%)  | <0.001  |
|                                      | High school                    | 5683 (41.8%) | 1976 (43.5%) | 1870 (41.2%) | 1837 (40.7%) |         |
|                                      | College or above               | 5049 (37.2%) | 1421 (31.3%) | 1732 (38.2%) | 1896 (42.0%) |         |
| Cigarette smoking                    | Current                        | 3297 (24.3%) | 1442 (31.8%) | 1010 (22.3%) | 845 (18.7%)  | <0.001  |
|                                      | Former                         | 4468 (32.9%) | 1386 (30.5%) | 1507 (33.2%) | 1575 (34.9%) |         |
|                                      | Never                          | 5817 (42.8%) | 1709 (37.7%) | 2018 (44.5%) | 2090 (46.3%) |         |
| Alcohol use                          | Current                        | 7828 (57.6%) | 2674 (58.9%) | 2614 (57.6%) | 2540 (56.3%) | 0.14    |
|                                      | Former                         | 2388 (17.6%) | 771 (17.0%)  | 786 (17.3%)  | 831 (18.4%)  |         |
|                                      | Never                          | 3372 (24.8%) | 1096 (24.1%) | 1136 (25.0%) | 1140 (25.3%) |         |
| Activity level                       | 1 <sup>st</sup> tertiles       | 5461 (40.3%) | 2154 (47.6%) | 1769 (39.1%) | 1538 (34.2%) | <0.001  |
|                                      | 2 <sup>nd</sup> tertiles       | 4157 (30.7%) | 1359 (30.0%) | 1414 (31.2%) | 1384 (30.8%) |         |
|                                      | 3 <sup>rd</sup> tertiles       | 3931 (29.0%) | 1010 (22.3%) | 1345 (29.7%) | 1576 (35.0%) |         |
| BMI, mean, SD (kg/m <sup>2</sup> )   |                                | 27.6 (5.3)   | 27.4 (5.2)   | 27.5 (5.2)   | 27.9 (5.4)   | <0.001  |
| Calories, mean, SD (kcal/day)        |                                | 1629 (605)   | 1346 (504)   | 1566 (514)   | 1978 (613)   | <0.001  |
| History of CAD                       |                                | 605 (4.5%)   | 171 (3.8%)   | 193 (4.3%)   | 241 (5.3%)   | <0.001  |
| Total cholesterol, mean, SD (mmol/L) |                                | 5.56 (1.08)  | 5.56 (1.10)  | 5.56 (1.05)  | 5.57 (1.08)  | 0.98    |
| History of hypertension              |                                | 4470 (33.0%) | 1487 (32.9%) | 1512 (33.5%) | 1471 (32.7%) | 0.74    |
| History of diabetes                  |                                | 1437 (10.7%) | 394 (8.8%)   | 472 (10.5%)  | 571 (12.7%)  | <0.001  |
| # of APOE ε4 allele                  | 0                              | 9125 (69.3%) | 3011 (68.4%) | 3081 (70.1%) | 3033 (69.6%) | 0.21    |
|                                      | 1                              | 3695 (28.1%) | 1284 (29.2%) | 1191 (27.1%) | 1220 (28.0%) |         |
|                                      | 2                              | 339 (2.6%)   | 109 (2.5%)   | 124 (2.8%)   | 106 (2.4%)   |         |
| Prevalent stroke through Visit 2     |                                | 224 (1.6%)   | 81 (1.8%)    | 75 (1.7%)    | 68 (1.5%)    | 0.59    |
| Western Diet Score (mean, SD)        |                                | -0.03 (1.54) | -0.00 (1.43) | -0.08 (1.50) | -0.00 (1.69) | 0.020   |
| Prudent Diet Score (mean, SD)        |                                | 0.03 (1.41)  | -1.35 (0.47) | -0.16 (0.33) | 1.59 (1.14)  | <0.001  |
| Cohort Attrition                     | Missing visit 5 cognitive test | 7873 (57.9%) | 2697 (59.4%) | 2583 (56.9%) | 2593 (57.5%) | 0.05    |
|                                      | Death                          | 3880 (28.6%) | 1345 (29.6%) | 1263 (27.8%) | 1272 (28.2%) | 0.14    |

Values shown are No. (%) unless otherwise specified

P-value represents chi-squared or two-sided t-tests as appropriate
